# Supplementary material for: Urinary Exosomal miRNAs as biomarkers of bladder Cancer and experimental verification of mechanism of miR-93-5p in bladder Cancer
Source: Springer Nature journal article supplement (doi:10.1186/s12885-021-08926-x), 2021-12-01

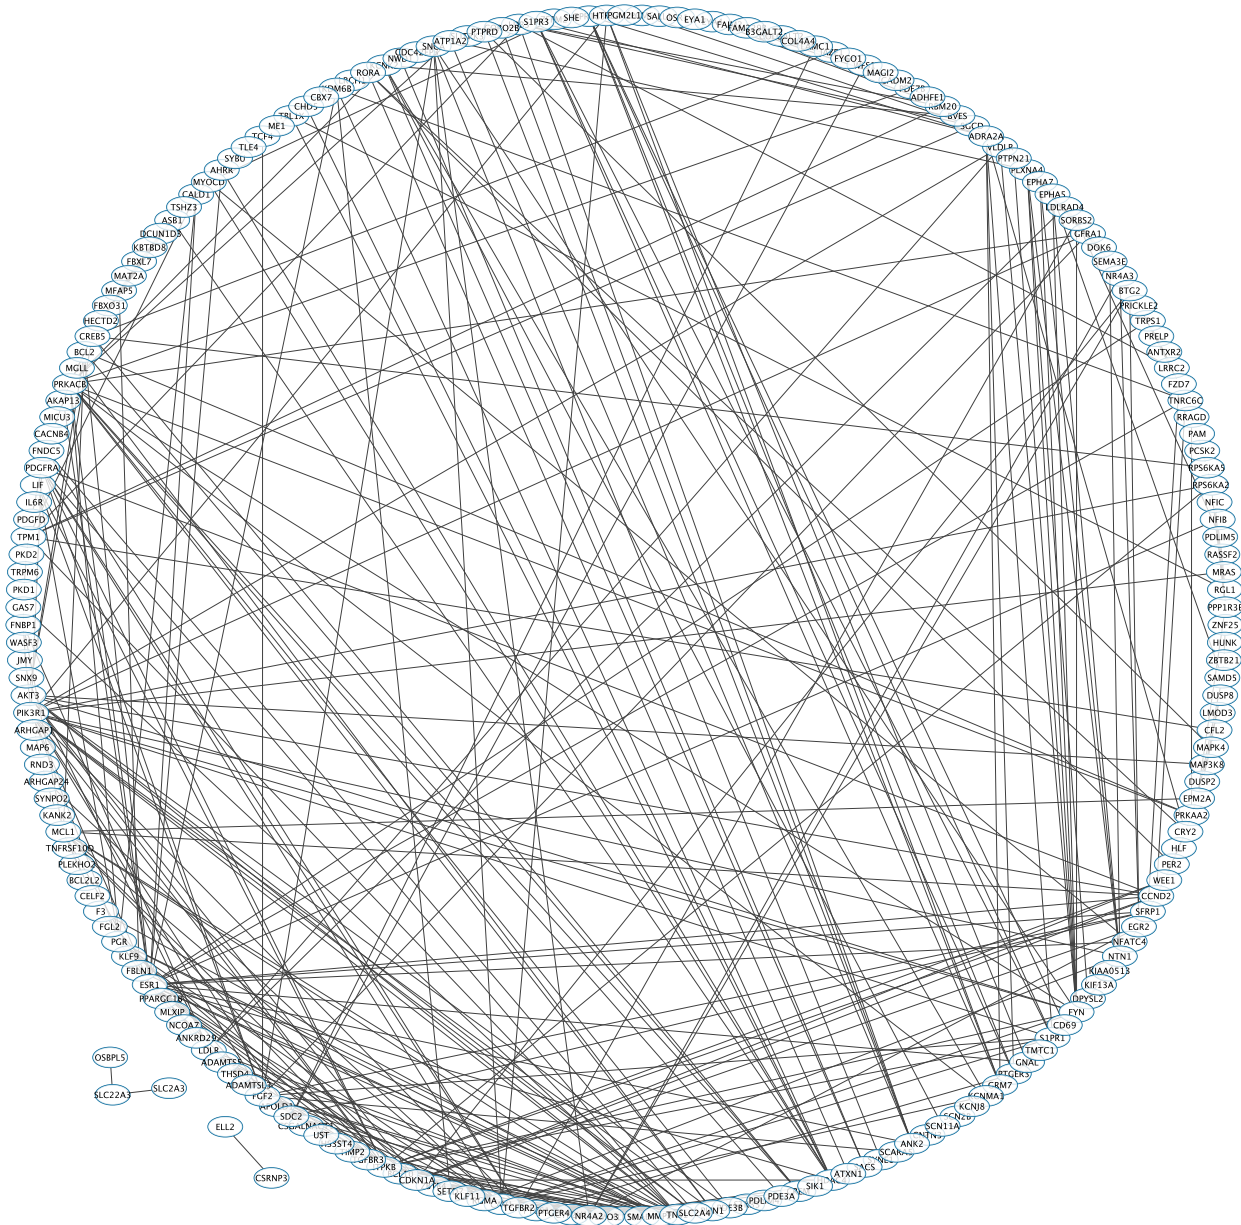

Supplement: MOESM4 [file 19930800]
